# Supplementary material for: Unusual Ratio between Free Thyroxine and Free Triiodothyronine in a Long-Lived Mole-Rat Species with Bimodal Ageing
Source: PubMed Central journal article supplement (PMC4237498; doi:10.1371/journal.pone.0113698), 2014-11-19
Supplement: pone.0113698.s001.pdf [file pone.0113698.s001.pdf]

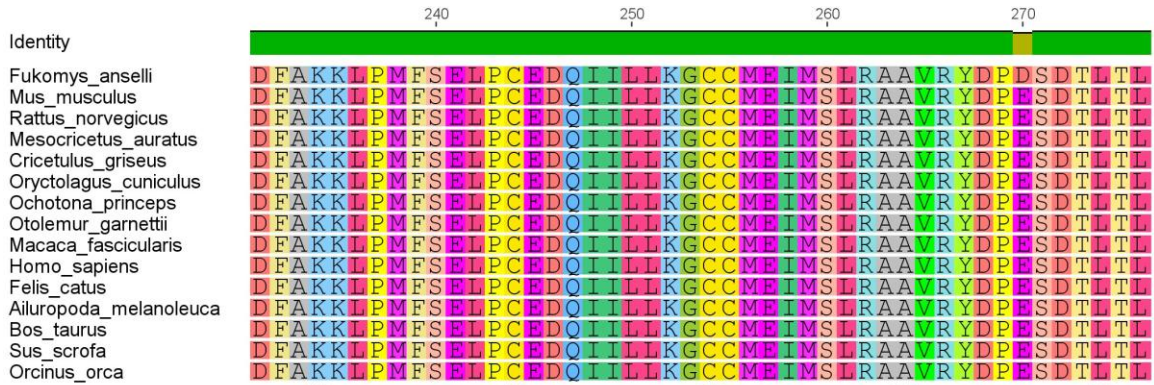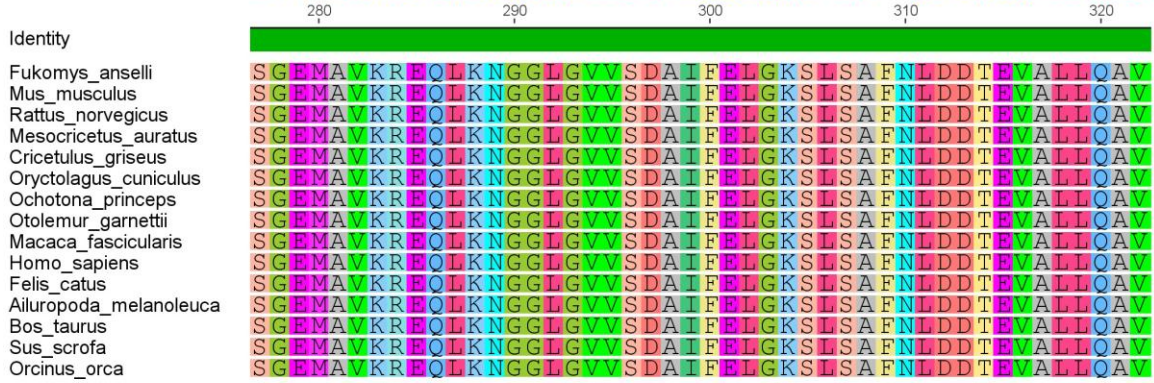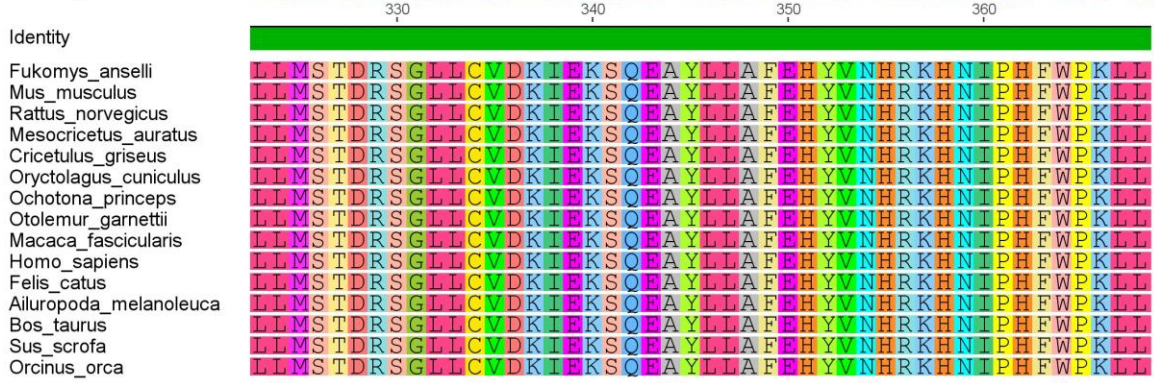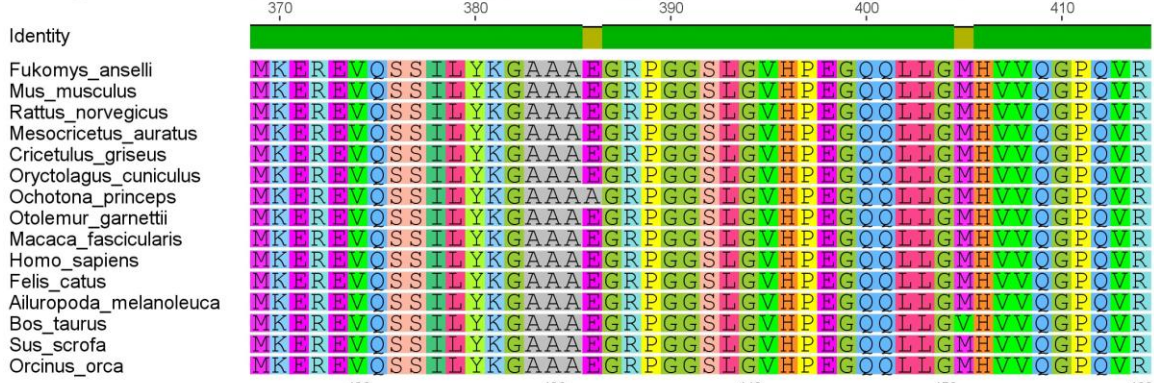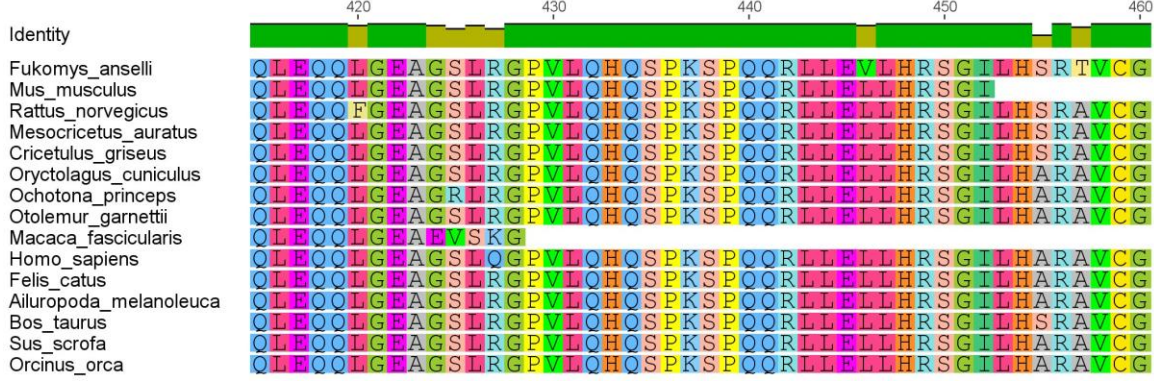



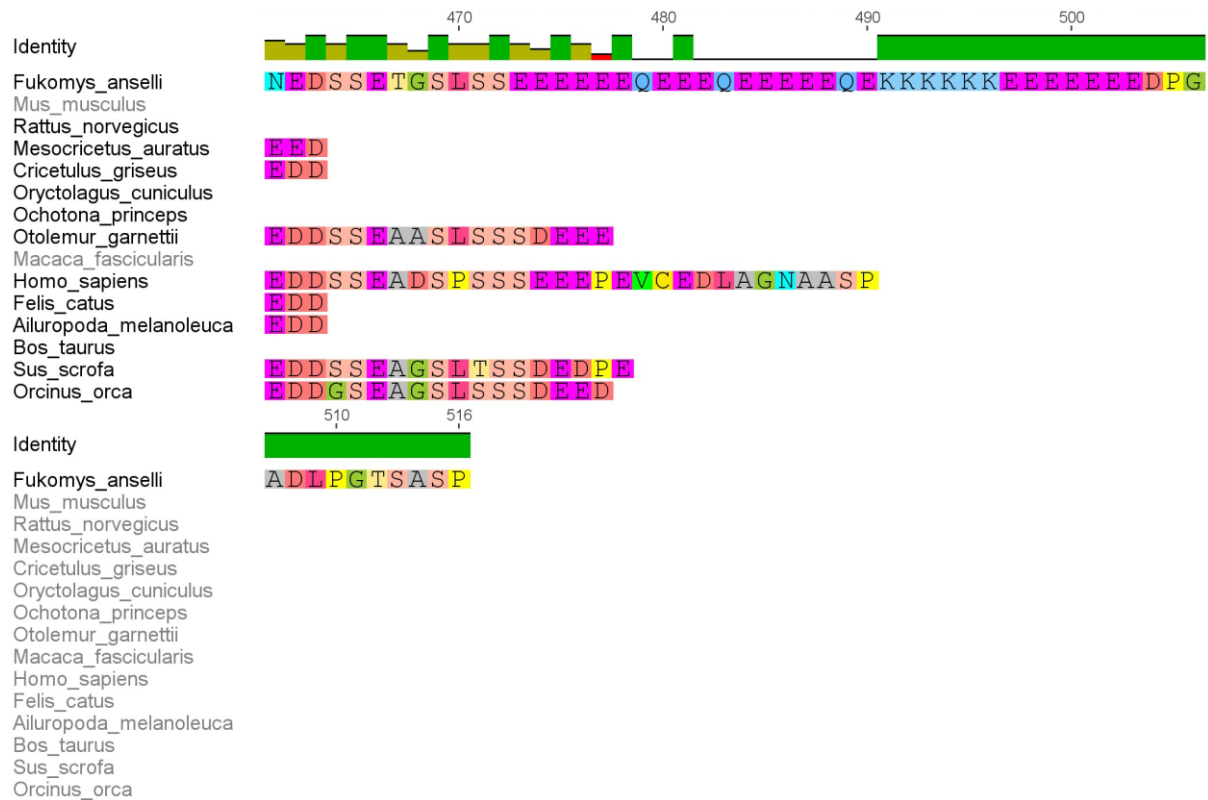

**Figure S1. Protein alignment of thyroid hormone receptor  $\alpha$  (THRA) from different mammal species.**

The mRNA sequence of *F. anselli* was obtained from RNA-seq and subsequently translated, other sequences were retrieved from NCBI databases with the following accession numbers: *Mus musculus* (CAA30576), *Rattus norvegicus* (NP\_112396), *Mesocricetus auratus* (XP\_005076008), *Cricetulus griseus* (XP\_003510526), *Oryctolagus cuniculus* (XP\_002719397), *Ochotona princeps*(XP\_004591220), *Otolemur garnettii* (XP\_003786450), *Macaca fascicularis* (NP\_001270601), *Homo sapiens* (NP\_003241), *Felis catus* (XP\_003996845), *Ailuropoda melanoleuca* (XP\_002924975), *Bos Taurus* (NP\_001039794), *Sus scrofa* (O97716), *Orcinus orca* (XP\_004282800).
