# Supplementary material for: Unusual Ratio between Free Thyroxine and Free Triiodothyronine in a Long-Lived Mole-Rat Species with Bimodal Ageing
Source: PubMed Central journal article supplement (PMC4237498; doi:10.1371/journal.pone.0113698), 2014-11-19
Supplement: pone.0113698.s002.pdf [file pone.0113698.s002.pdf]

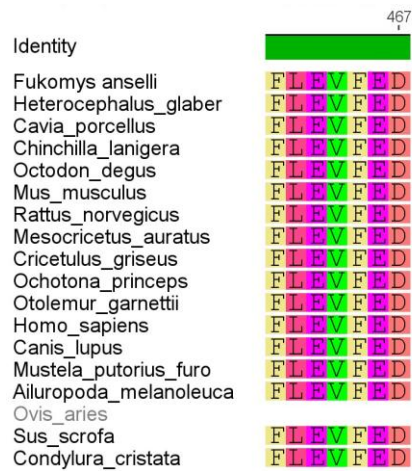

**Figure S2. Protein alignment of thyroid hormone receptor  $\beta$  (THR $\beta$ ) from different mammal species.**

The mRNA sequence of *F. anselli* was obtained from RNA-seq and subsequently translated, other sequences were retrieved from NCBI databases with the following accession numbers: *Heterocephalus glaber* (XP\_004892721), *Cavia porcellus* (XP\_005008354), *Chinchilla lanigera* (XP\_005387539), *Octodon degus* (XP\_004634245), *Mus musculus* (P37242), *Rattus norvegicus* (P18113), *Mesocricetus auratus* (XP\_005081037), *Cricetulus griseus* (ERE87100), *Ochotona princeps* (XP\_004588346), *Otolemur garnettii* (XP\_003781795), *Homo sapiens* (P10828), *Canis lupus* (XP\_862690), *Mustela putorius furo* (XP\_004786805), *Ailuropoda melanoleuca* (XP\_002928077), *Ovis aries* (Q28571), *Sus scrofa* (XP\_001928500), *Condylura cristata* (XP\_004692336).
