# Supplementary material for: Unusual Ratio between Free Thyroxine and Free Triiodothyronine in a Long-Lived Mole-Rat Species with Bimodal Ageing
Source: PubMed Central journal article supplement (PMC4237498; doi:10.1371/journal.pone.0113698), 2014-11-19
Supplement: pone.0113698.s003.pdf [file pone.0113698.s003.pdf]

**Figure S3. Protein alignment of thyrotropin  $\beta$  subunit (TSHB) from different mammal species.**

The mRNA sequence of *F. ansellii* was obtained from RNA-seq and subsequently translated, other sequences were retrieved from NCBI databases with the following accession numbers: *Cavia porcellus* (XP\_003479306), *Octodon degus* (XP\_004641725), *Mus musculus* (NP\_001159412), *Rattus norvegicus* (NP\_037248), *Ictidomys tridecemlineatus* (XP\_005334966), *Otolemur garnettii* (XP\_003793878), *Macaca fascicularis* (XP\_001111873), *Nomascus leucogenys* (XP\_003268073), *Gorilla gorilla* (XP\_004026450), *Pan paniscus* (XP\_003805682), *Pan troglodytes* (XP\_001160337), *Homo sapiens* (AAB30828), *Bos taurus* (XP\_005204060), *Orcinus orca* (XP\_004263279), *Echinops telfairi* (XP\_004714911).
