# Supplementary material for: Unusual Ratio between Free Thyroxine and Free Triiodothyronine in a Long-Lived Mole-Rat Species with Bimodal Ageing
Source: PubMed Central journal article supplement (PMC4237498; doi:10.1371/journal.pone.0113698), 2014-11-19
Supplement: pone.0113698.s004.pdf [file pone.0113698.s004.pdf]

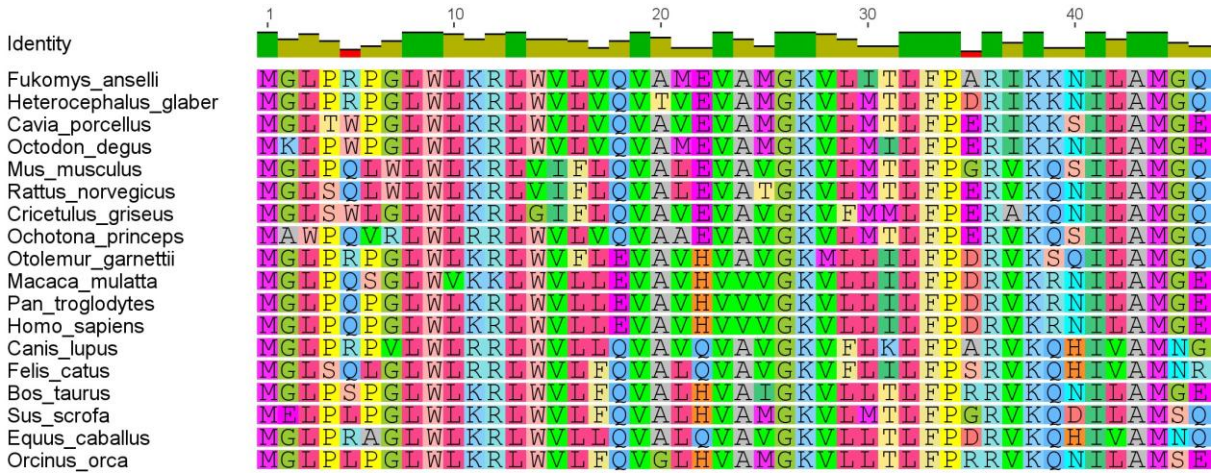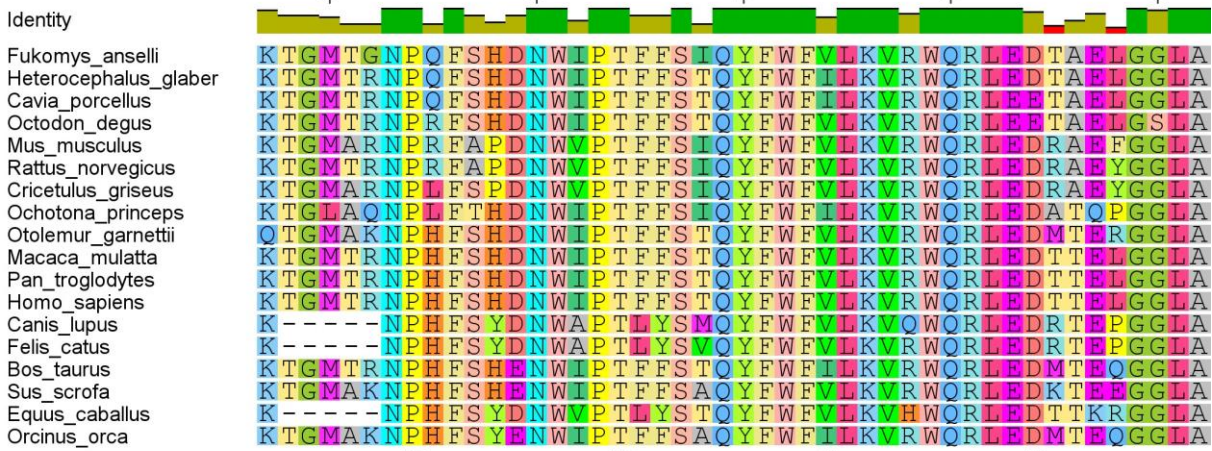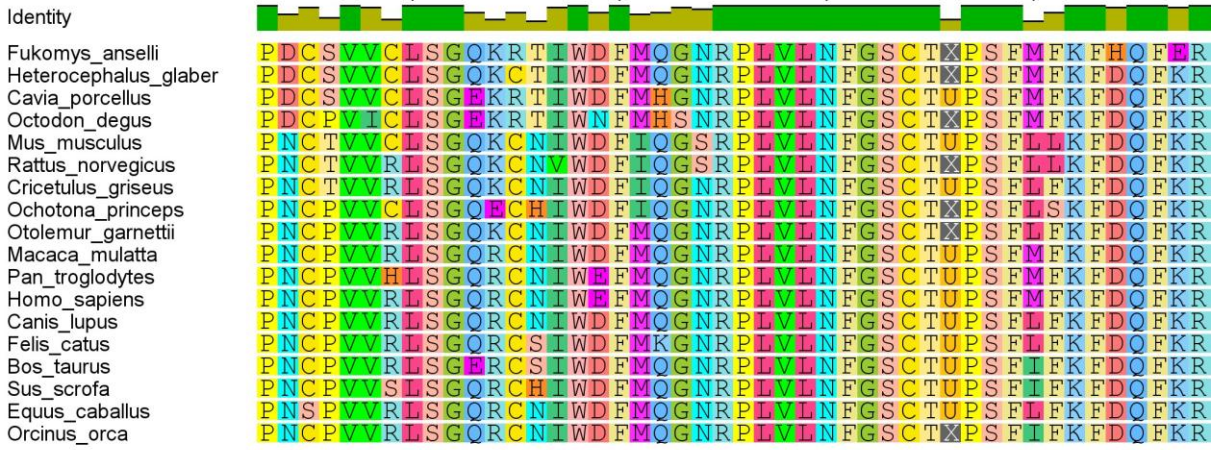

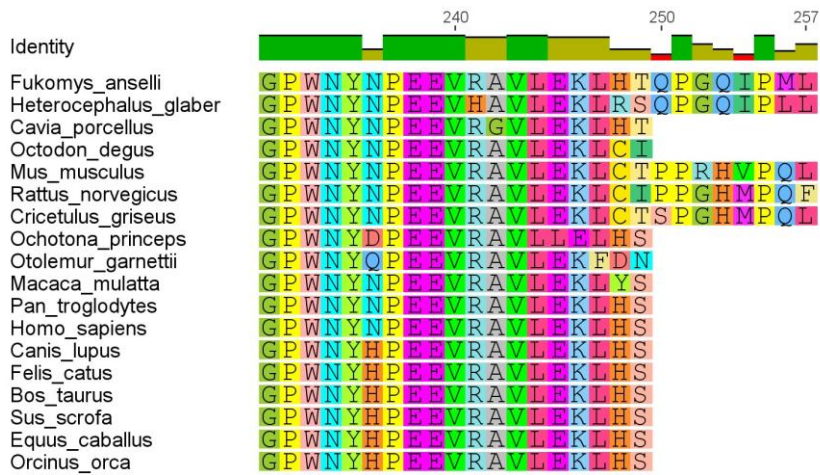

**Figure S4. Protein alignment of Type I iodothyronine deiodinase (D1) from different mammal species.**

The mRNA sequence of *F. anselli* was obtained from RNA-seq and subsequently translated, other sequences were retrieved from NCBI databases with the following accession numbers: *Heterocephalus glaber* (XP\_004908861), *Cavia porcellus* (NP\_001244903), *Octodon degus* (XP\_004642620), *Mus musculus* (Q61153), *Rattus norvegicus* (CAA41063), *Cricetulus griseus* (NP\_001243688), *Ochotona princeps* (XP\_004588749), *Otolemur garnettii* (XP\_003793192), *Macaca mulatta* (NP\_001116124), *Pan troglodytes* (NP\_001116123), *Homo sapiens* (NP\_000783), *Canis lupus* (NP\_001007127), *Felis catus* (NP\_001009267), *Bos taurus* (NP\_001116065), *Sus scrofa* (NP\_001001627), *Equus caballus* (NP\_001159924), *Orcinus orca* (XP\_004273874).
