# Supplementary material for: Unusual Ratio between Free Thyroxine and Free Triiodothyronine in a Long-Lived Mole-Rat Species with Bimodal Ageing
Source: PubMed Central journal article supplement (PMC4237498; doi:10.1371/journal.pone.0113698), 2014-11-19
Supplement: pone.0113698.s005.pdf [file pone.0113698.s005.pdf]

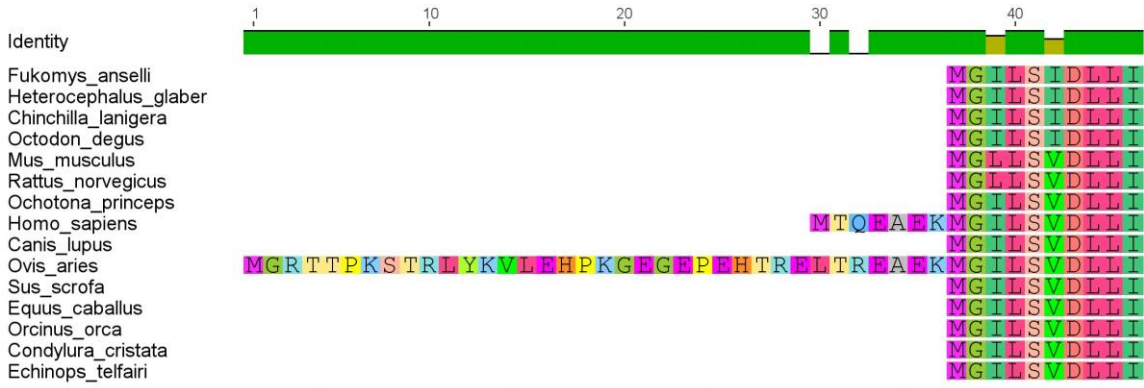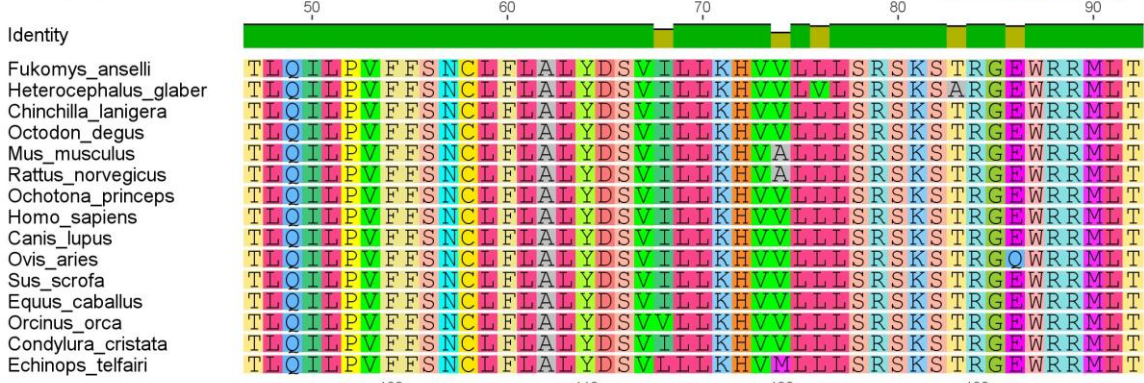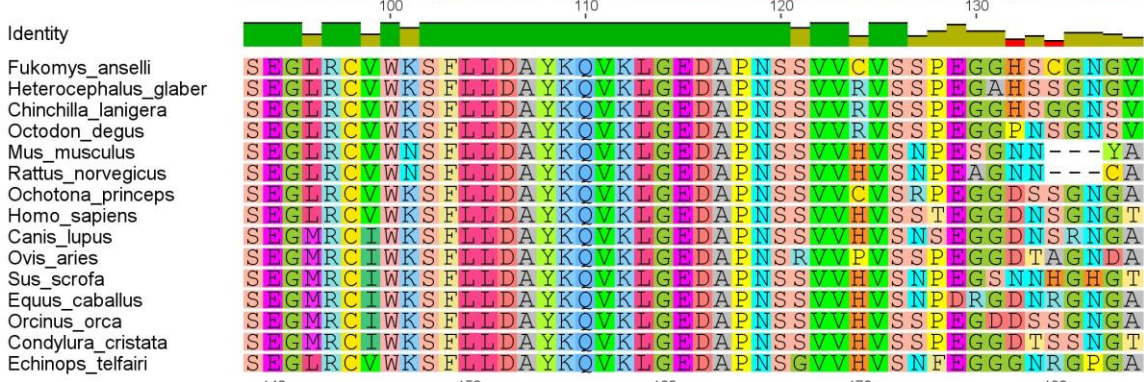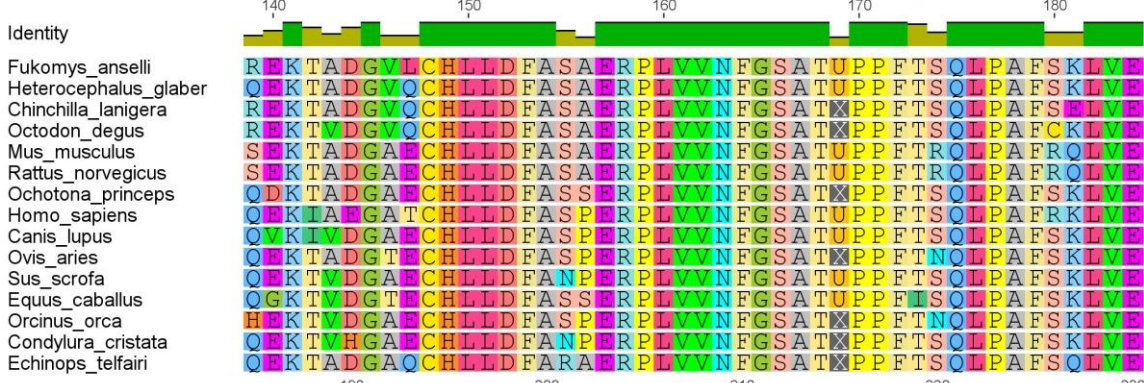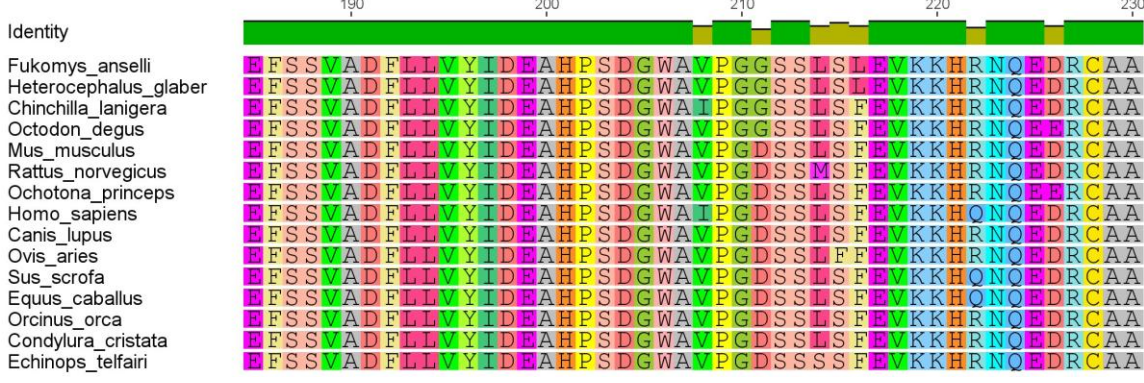



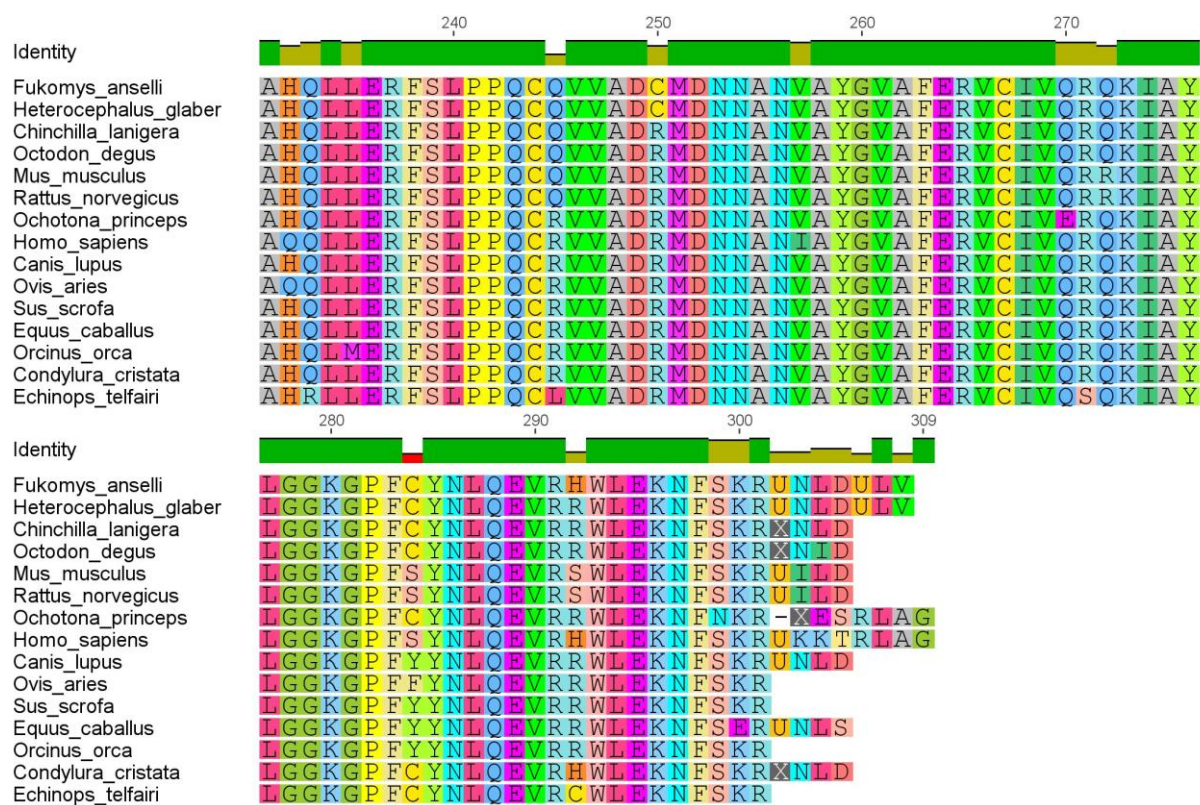

**Figure S5. Protein alignment of Type II iodothyronine deiodinase (D2) from different mammal species.**

The mRNA sequence of *F. anselli* was obtained from RNA-seq and subsequently translated, other sequences were retrieved from NCBI databases with the following accession numbers: *Heterocephalus glaber* (XP\_004900438), *Chinchilla lanigera* (XP\_005390287), *Octodon degus* (XP\_004624767), *Mus musculus* (NP\_034180), *Rattus norvegicus* (NP\_113908), *Ochotona princeps* (XP\_004584413), *Homo sapiens* (AAC95470), *Canis lupus* (NP\_001116117), *Ovis aries* (XP\_004011138), *Sus scrofa* (NP\_001001626), *Equus caballus* (NP\_001159927), *Orcinus orca* (XP\_004262346), *Condylura cristata* (XP\_004681708), *Echinops telfairi* (XP\_004698804).
