# Supplementary material for: Unusual Ratio between Free Thyroxine and Free Triiodothyronine in a Long-Lived Mole-Rat Species with Bimodal Ageing
Source: PubMed Central journal article supplement (PMC4237498; doi:10.1371/journal.pone.0113698), 2014-11-19
Supplement: pone.0113698.s008.pdf [file pone.0113698.s008.pdf]

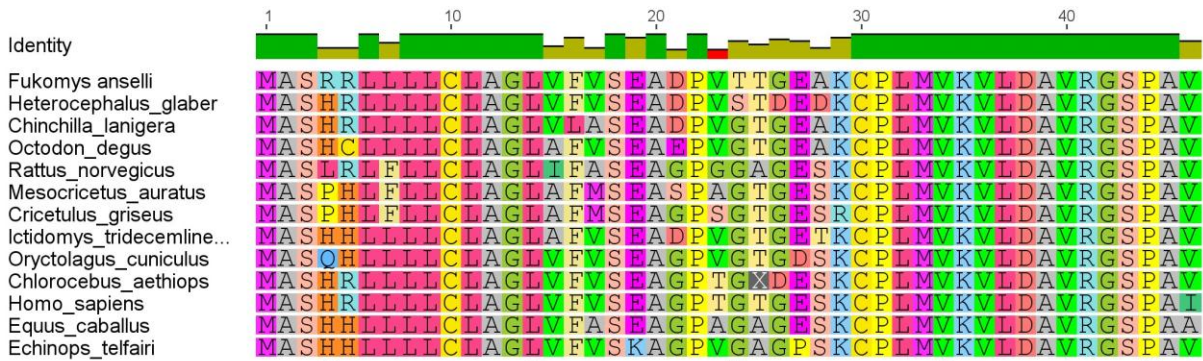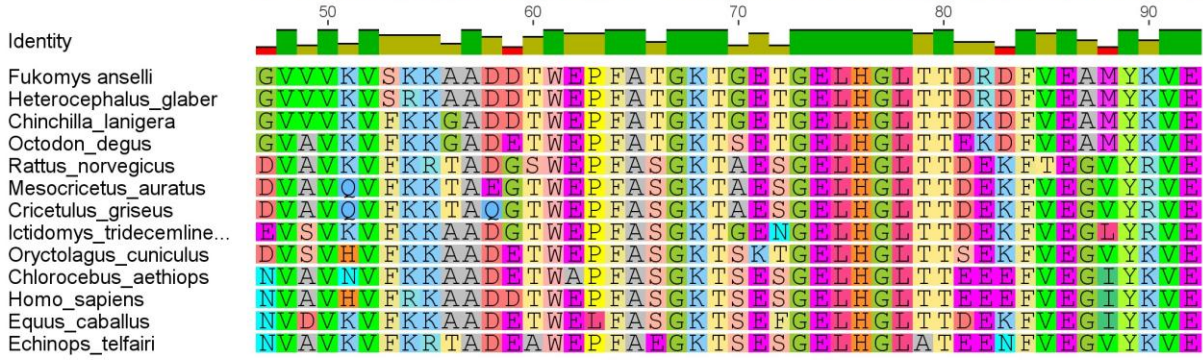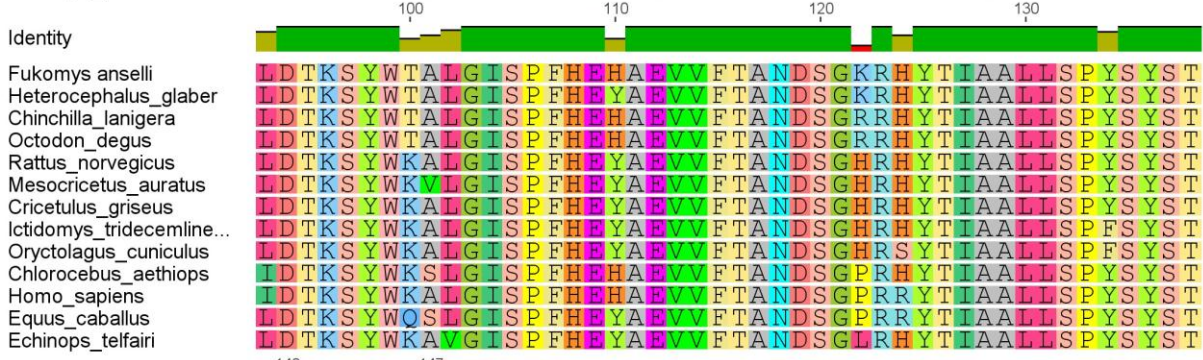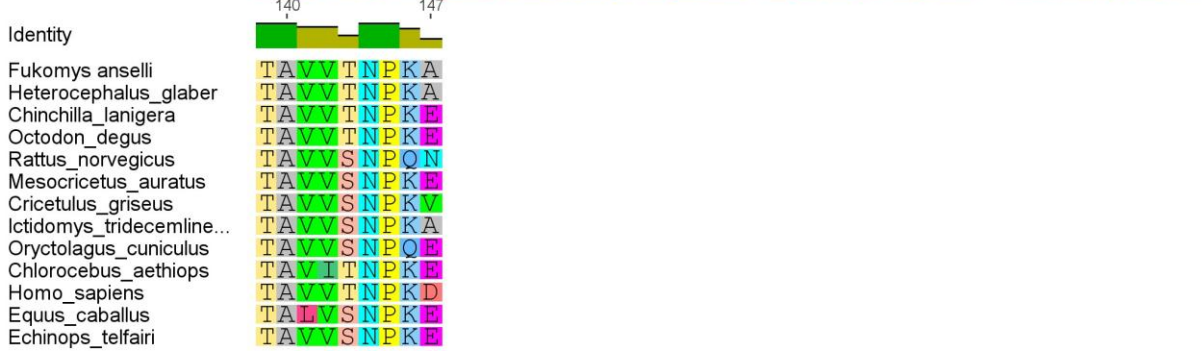

**Figure S8. Protein alignment of transthyretin (TTR) from different mammal species.**

The mRNA sequence of *F. anselli* was obtained from RNA-seq and subsequently translated, other sequences were retrieved from NCBI databases with the following accession numbers: *Heterocephalus glaber* (XP\_004905241), *Chinchilla lanigera* (XP\_005372800), *Octodon degus* (XP\_004623610), *Rattus norvegicus* (AAA41801), *Mesocricetus auratus* (XP\_005065406), *Cricetulus griseus* (XP\_003510202), *Ictidomys tridecemlineatus* (XP\_005337518), *Oryctolagus cuniculus* (XP\_002713532), *Chlorocebus aethiops* (BAL44398), *Homo sapiens* (CAG33189), *Equus caballus* (XP\_001495232), *Echinops telfairi* (XP\_004702987).
