# Supplementary material for: Unusual Ratio between Free Thyroxine and Free Triiodothyronine in a Long-Lived Mole-Rat Species with Bimodal Ageing
Source: PubMed Central journal article supplement (PMC4237498; doi:10.1371/journal.pone.0113698), 2014-11-19
Supplement: pone.0113698.s009.pdf [file pone.0113698.s009.pdf]

Identity

1 10 20 30 40

Fukomys anelli  
Heterocephalus glaber  
Octodon degus MCYYLHS  
Mus musculus  
Rattus norvegicus  
Cricetulus griseus MCVASWACAL TCHWYLFKRFTTIPYSSINTPSNTFFS FVNQDHLHS  
Otolemur garnettii MCYYLPSY  
Gorilla gorilla  
Pan troglodytes  
Homo sapiens MOGQGRRRGTCKDIFCS  
Canis lupus MCVHFFPS  
Bos taurus  
Ovis aries  
Sus scrofa  
Equus caballus  
Orcinus orca MCYYPPS  
Echinops telfairi

Identity

50 60 70 80 90

Fukomys anelli MSIFLYI THFLLGLHAT TNGAPPRSSSEGGKVTTCYIP OOND TLYKM  
Heterocephalus glaber MSVFLYI TFLVGLHAT TNGAPPSSEGGKVTTCYIP OOND TLYKM  
Octodon degus RMSIFLYI TFLVGLHAK ISGGLPSRSEGGKVTTCYIP OOND TLYKM  
Mus musculus MSVFFYI FVLLVGLQAT THCAPHNSSSEGGKVTTCYIP OONATLYKM  
Rattus norvegicus LVLGLQAT THCAPHNSSSEGGKVTTCYIP OONATLYKM  
Cricetulus griseus RMSVFLYI FLLVFLQDT TNC AQYNSSEGGKVTTCYIP OONATLYKM  
Otolemur garnettii KMSLFLYI TLLVGLHVT THCAPLNSSEGGKITTCYIP OONATLYKM  
Gorilla gorilla MSPFLYI VLLVGLHAT THCA --- SP EGKVTACHSSOPNATLYKM  
Pan troglodytes MSPFLYI VLLVGLHAT THCA --- SP EGKVTACHSSOPNATLYKM  
Homo sapiens KMASYLYGVI FAVGLCAPTYCVSP -ANAPSAAYPRPSS TKSTPASQV  
Canis lupus KMPFLYI AALLVGLHCASSI --- RSEGGKVTTCNSPPKNA TFYKM  
Bos taurus MPLFFSI VLLVGLHCAPPN --- SCEGGKITTSCLSP OONATLYKM  
Ovis aries MPLFFSI VLLVGLHCAPPN --- SCEGGKITTSCLSP OONATLYKM  
Sus scrofa MPLFFSI VLLVGLHCAPPN --- SCEGGKITTSCLSP OONATLYKM  
Equus caballus MPLFFSI VLLVGLHCAPPN --- SCEGGKITTSCLSP OONATLYKM  
Orcinus orca KMPFLFFYLV FLLVGLHCAPPN --- SCEGGKITTSCLSP OONATLYKM  
Echinops telfairi MPPSLLYKV FLLVGLHVT THCAPSNSSSEGGVTTCYIP OHNV TLYKM

Identity

100 110 120 130 140

Fukomys anelli SSINADFA FNL YRKF TWE TPDONIFFS PVS ISAALAMLS FGAGSST  
Heterocephalus glaber SSINADFA FNL YRKF FAV ETPDONIFFS PVS ISAALAMLS FGAGSST  
Octodon degus SSINADFA FNL YRKF FAV ETPDONIFFS PVS ISVALAMLS FGAGSST  
Mus musculus PSINADFA FNL YRRLF S M ENPDINIFFS PVS ISVALAMLS FGAGSST  
Rattus norvegicus PSINADFA FNL YRRLF S M ENPDINIFFS PVS ISAALAMLS FGAGSST  
Cricetulus griseus PFINADFA FNL YRRLF S M ENPDWNIFFS PVS ISAALAMLS FGAGSST  
Otolemur garnettii SSINADFA FNL YRRLF T ETPDRNIFFS PVS ISAALAMLS FGAGSST  
Gorilla gorilla SSINADFA FNL YRRLF T ETPDKNIFFS PVS ISAALVMLS FGAGCST  
Pan troglodytes SSINADFA FNL YRRLF T ETPDKNIFFS PVS ISAALVMLS FGAGCST  
Homo sapiens YSLNTDF FNL YRRLF T ETPSQNIFFS PVS MSTSLAMLS LGHGSMT  
Canis lupus SSINADFA FNL YRRLF TWE TPDNRNIFFS PVS ISAALAMLS FGACYSST  
Bos taurus SSINADFA FNL YRRLF TWE TPDONIFFS PVS ISAGLAMLS LGACSSST  
Ovis aries SSINADFA FNL YRKF TWE TPDONIFFS PVS ISAGLAMLS LGACSSST  
Sus scrofa SSINADFA FNL YRRLF TWE TPDONIFFS PVS ISAALAMLS FGACSSST  
Equus caballus SSINADFA FNL YRRLF TWE TPDNRNIFFS PVS ISAALAMLS LGACSSST  
Orcinus orca SSINADFA FNL YRRLF TWE TPDONIFFS PVS ISAALAMLS TGACSSST  
Echinops telfairi SSINADFA FNL YRRLF TWE TPDONIFFS PVS ISAALAMLS HGASSNT

Identity

140 150 160 170 180

Fukomys anelli QTOILEV LGFNLT DTSMAEIQOGFOHLICSLNFPKKELELOMGNAL  
Heterocephalus glaber QTOILEV LGFNLT DTSMAEIQOGFOHLICSLNFPKKELELOMGNAL  
Octodon degus QTOILEV LGFNLT DTSMAEIQOGFOHLICSLNFPKKELELOMGNAL  
Mus musculus QTOILEV LGFNLT DTPMTELQOGFOHLICSLNFPKNELELOMGNAL  
Rattus norvegicus QTOILEV LGFNLT DTPMTELQOGFOHLICSLNFPNNELELOMGNAL  
Cricetulus griseus QTOILEV LGFNLT DTPMTELQOGFOHLICSLNFPKNELELOMGNAL  
Otolemur garnettii QTOILEV LGFNLT DTPMTELQOGFOHLICSLNFPKNELELOMGNAL  
Gorilla gorilla QTEIVV T LGFNLT DTPMTELQOGFOHLICSLNFPKKELELOMGNAL  
Pan troglodytes QTEIVV T LGFNLT DTPMTELQOGFOHLICSLNFPKKELELOMGNAL  
Homo sapiens KTOILVQ LGFNLT DTPMTELQOGFOHLVHSITVPSKDI T LKMSAAL  
Canis lupus QTOILEV LGFNLT DTPMTELQOGFOHLICSLNFPKKELELOMGNAL  
Bos taurus QTOILEV LGFNLT DTPMTELQOGFOHLICSLNFPKKELELOMGNAL  
Ovis aries QTOILEV LGFNLT DTPMTELQOGFOHLICSLNFPKKELELOMGNAL  
Sus scrofa QTOILEV LGFNLT DTPMTELQOGFOHLICSLNFPKKELELOMGNAL  
Equus caballus QTOILEV LGFNLT DTPMTELQOGFOHLICSLNFPKKELELOMGNAL  
Orcinus orca QTOILEV LGFNLT DTPMTELQOGFOHLICSLNFPKKELELOMGNAL  
Echinops telfairi QTOILEV LGFNLT VV S M A E I Q O G F O H L I C S L N F P K K E L E L O M G N A I

Identity

190 200 210 220 230

Fukomys anelli FIGKKLKP LK PFLDVK TLYETDVFSTDFS NVSAAQQA INSVKQR  
Heterocephalus glaber FIGKKLKP LK PFLDGVK TLYETDVFSTDFS NVSAAQA INSVKQR  
Octodon degus FIGKQLKP LK PFLDAMK TLYETVVFSTDFS NVSAAQA EINSVYKQR  
Mus musculus FIGQQLKP LAK FLDDVK TLYETEVVFSTDFS NVSAAQHQ INSVYKQR  
Rattus norvegicus FIGQQLKP LAK FLDDVK TLYETEVVFSTDFS NVSAAQA EINSVYKQR  
Cricetulus griseus FIGQHLP LK PFLDVK TLYETEVVFSTDFS NVSAAQA EINSVYKQR  
Otolemur garnettii FIGQQLKP LAK FLDDAK LYE T D V F S T D F S N V S A A Q Q E I N S V M E K K  
Gorilla gorilla FIGKHLKP LAK FLDDVK TLYETEVVFSTDFS NISAAQA EINSHVEMO  
Pan troglodytes FIGKHLKP LAK FLNDVK TLYETEVVFSTDFS NISAAQA EINSHVEMO  
Homo sapiens FMKKFLQ LQA N FLGNV K R L Y E A E V F S T D F S N P S I A Q A R I N S H V K K K  
Canis lupus FIGKQLKP LK PFLDDVKS LYE T E V F S T D F S N V S A A Q Q L I N S H V Y K Q R  
Bos taurus FIGKQLKP LK PFLDDVKS LYE T E V F S T D F S N V S A A Q Q E I N S V M E K K  
Ovis aries FIGKQLKP LK PFLDDVKS LYE T E V F S T D F S N V S A A Q Q E I N S H V E R Q  
Sus scrofa FIGKQLKP LK PFLDDVKS LYE T E V F S T D F S N V S A A Q Q E I N S H V E R Q  
Equus caballus FIGKQLKP LK PFLDDVKS LYE T E V F S T D F S N I S T A Q Q E I N S H V Y K Q R  
Orcinus orca FIGKQLKP LK PFLDDVKS LYE T E V F S T N F S N V S A A Q Q E I N S H V Y K R K  
Echinops telfairi FIGKQLKP LK PFLDDVKS LYE T E V I S T D F S N V S A A Q Q E I N S H V D K Q



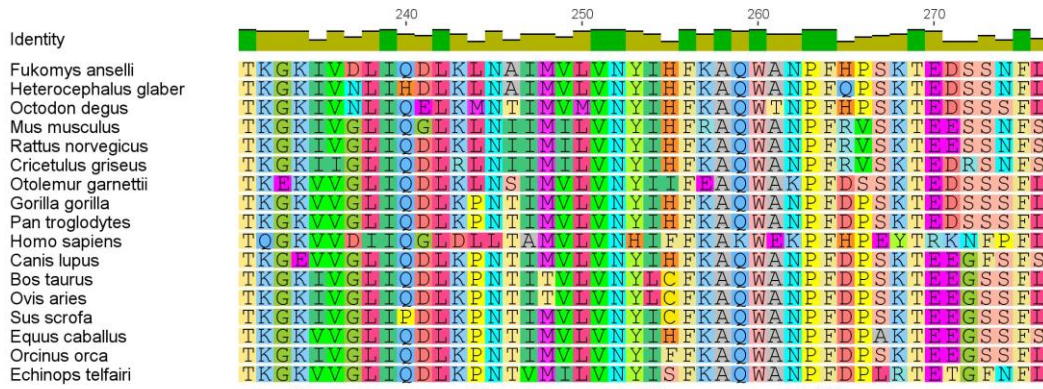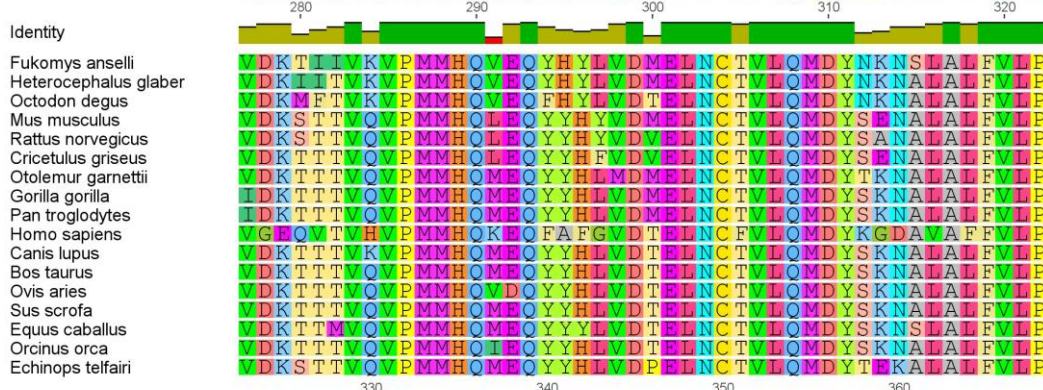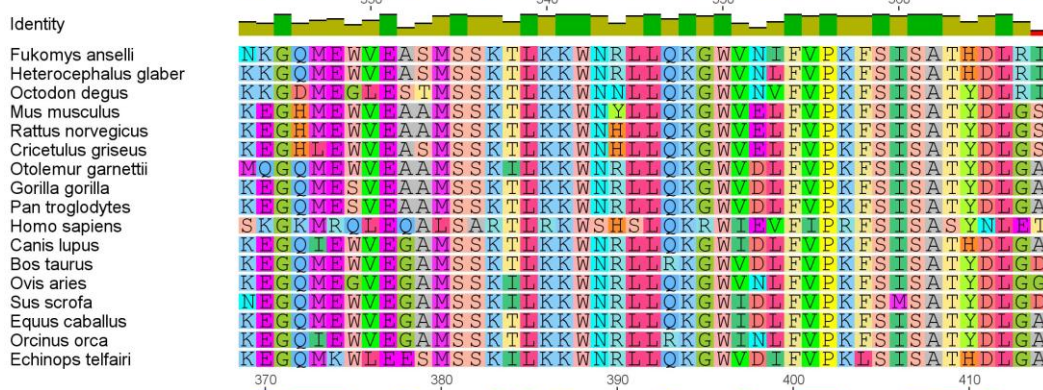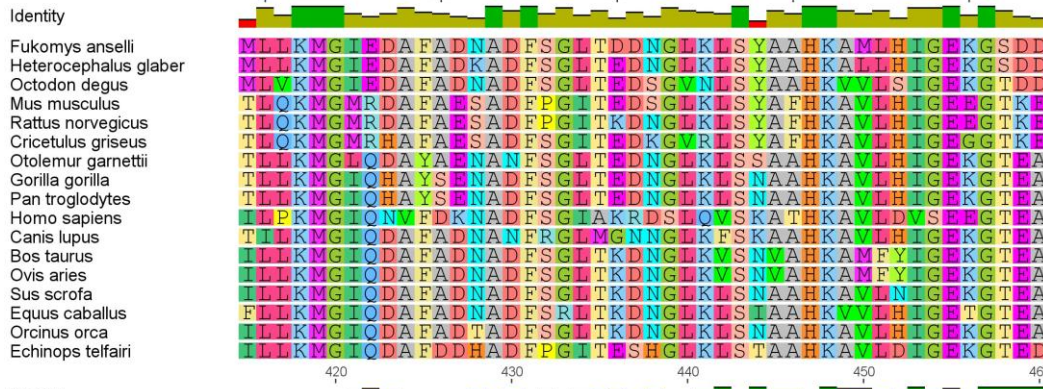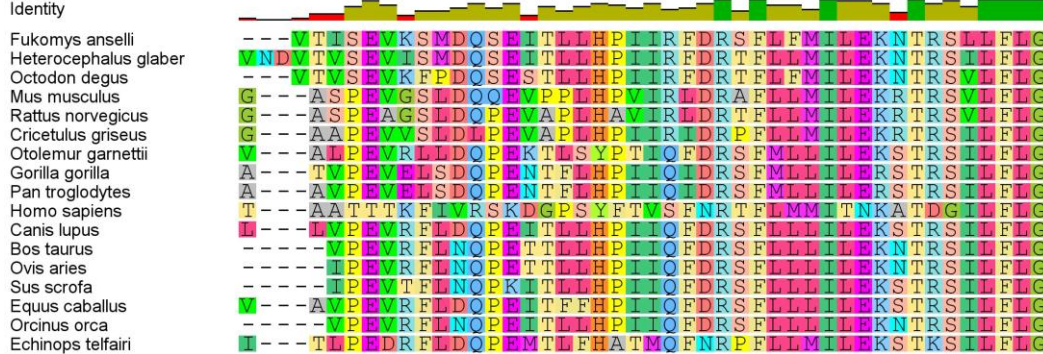

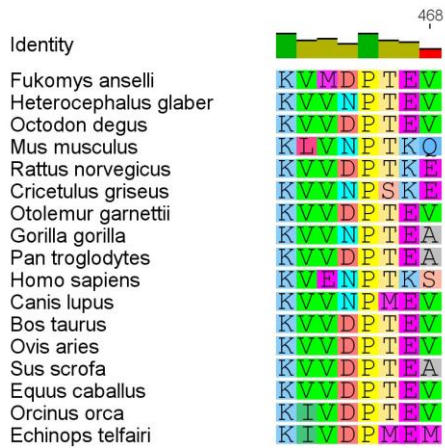

**Figure S9. Protein alignment of thyroxine-binding globin (TBG) from different mammal species.**

The mRNA sequence of *F. ansellii* was obtained from RNA-seq and subsequently translated, other sequences were retrieved from NCBI databases with the following accession numbers: *Heterocephalus glaber* (EHB09876), *Octodon degus* (XP\_004646260), *Mus musculus* (P61939), *Rattus norvegicus* (AAA42205), *Cricetulus griseus* (ERE65740), *Ootlemur garnettii* (XP\_003801681), *Gorilla gorilla* (XP\_004064693), *Pan troglodytes* (NP\_001009109), *Homo sapiens* (NP\_783866), *Canis lupus* (XP\_538128), *Bos taurus* (AAI03464), *Ovis aries* (NP\_001094390), *Sus scrofa* (Q9TT35), *Equus caballus* (XP\_001493492), *Orcinus orca* (XP\_004285286), *Echinops telfairi* (XP\_004710081).
