# Supplementary material for: Unusual Ratio between Free Thyroxine and Free Triiodothyronine in a Long-Lived Mole-Rat Species with Bimodal Ageing
Source: PubMed Central journal article supplement (PMC4237498; doi:10.1371/journal.pone.0113698), 2014-11-19
Supplement: pone.0113698.s011.pdf [file pone.0113698.s011.pdf]

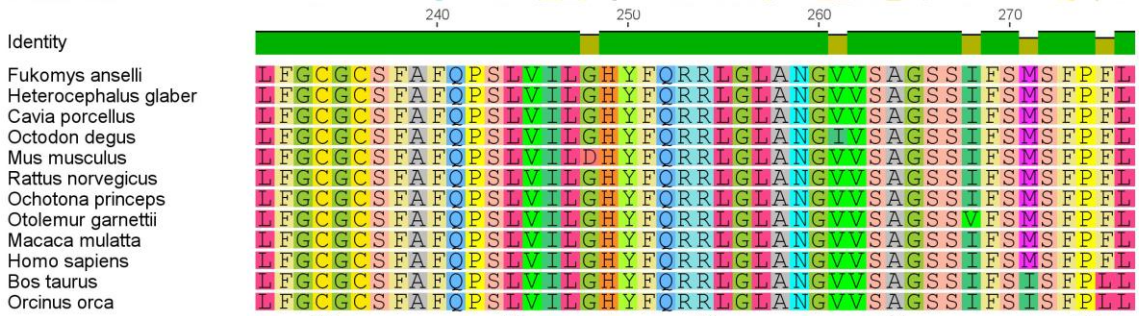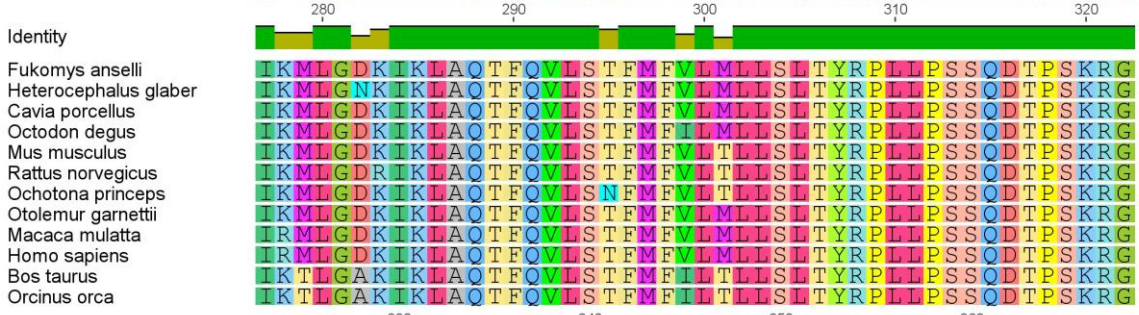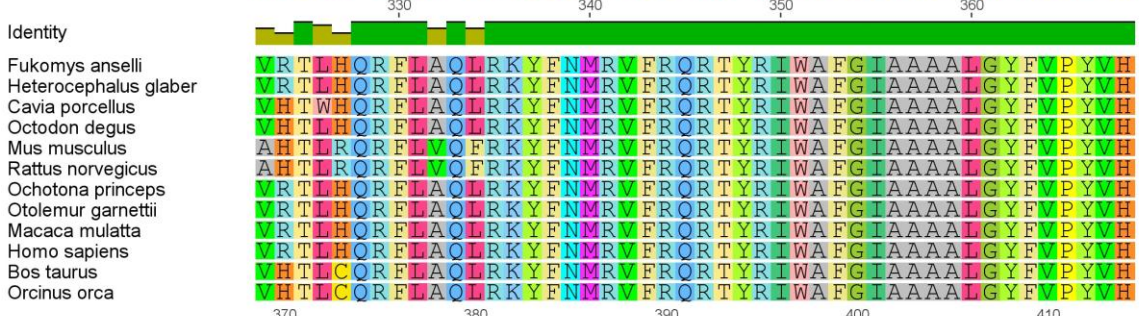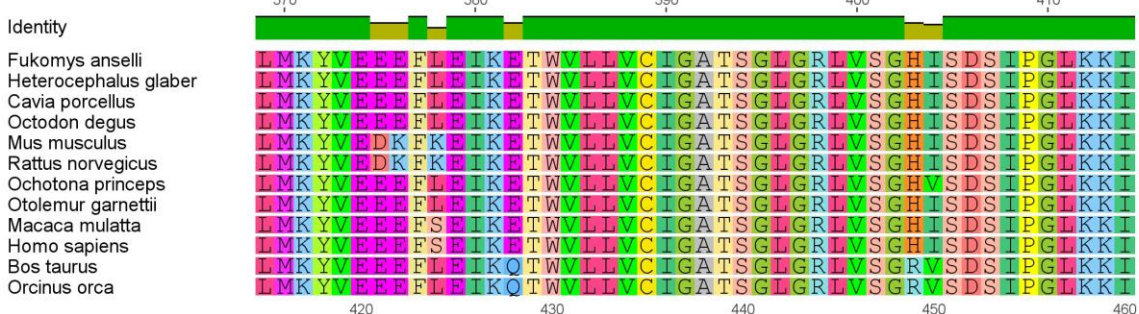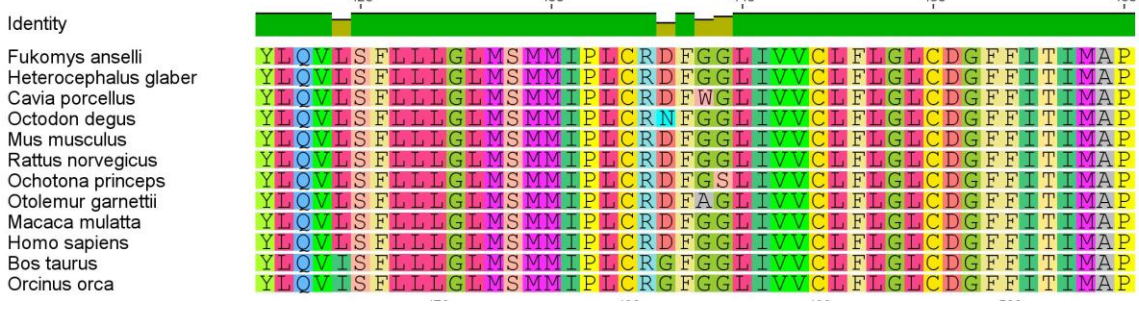



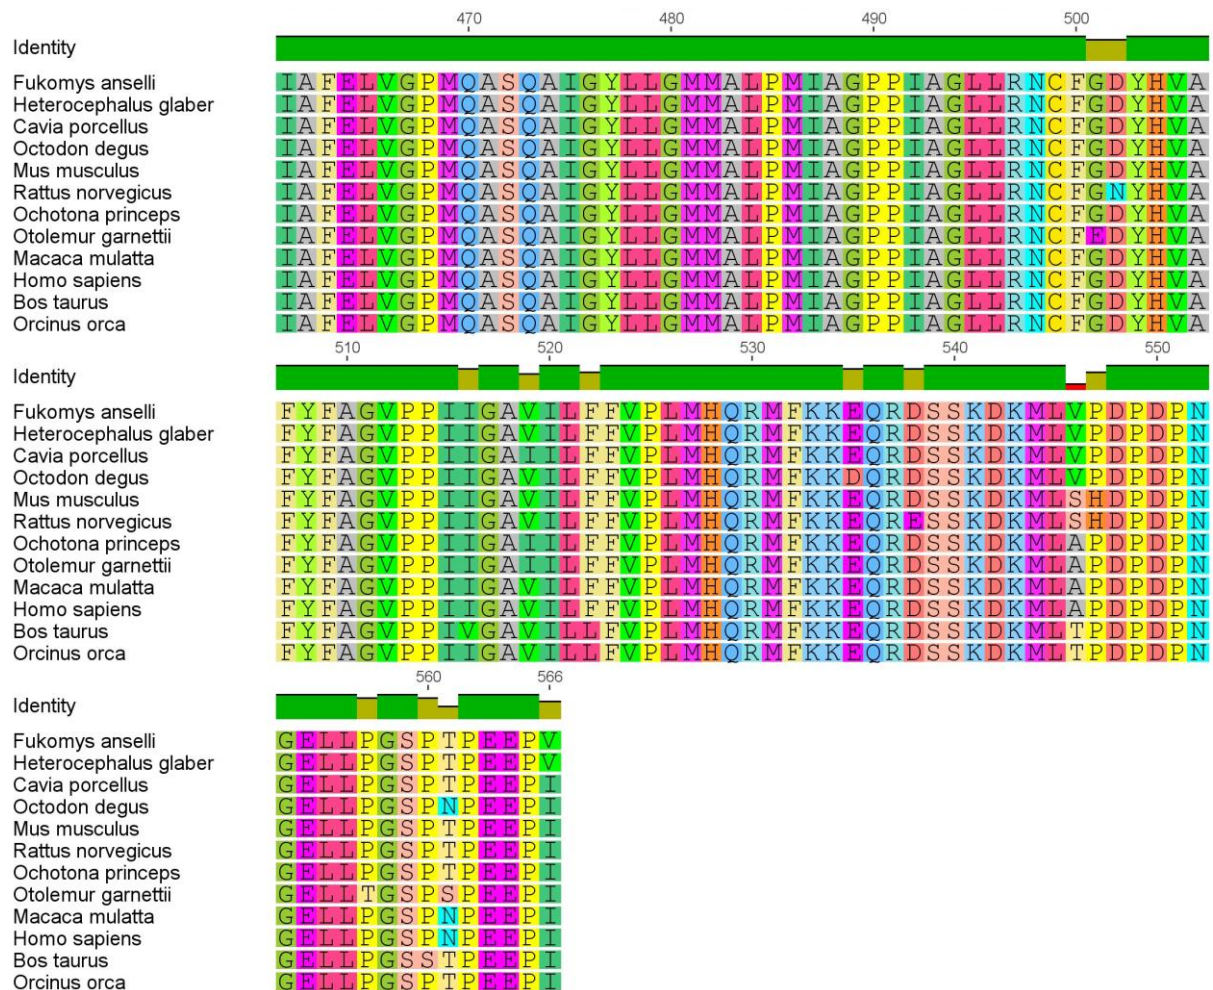

**Figure S11. Protein alignment of Monocarboxylate transporter 8 (MCT8) from different mammal species.**

The mRNA sequence of *F. ansellii* was obtained from RNA-seq and subsequently translated, other sequences were retrieved from NCBI databases with the following accession numbers: *Heterocephalus glaber* (XP\_004905154), *Cavia porcellus* (XP\_005004229), *Octodon degus* (XP\_004648070), *Mus musculus* (AAC40078), *Rattus norvegicus* (EDM07172), *Ochotona princeps* (XP\_004592817), *Otolemur garnettii* (XP\_003802275), *Macaca mulatta* (XP\_001096017), *Homo sapiens* (NP\_006508), *Bos taurus* (NP\_001193868), *Orcinus orca* (XP\_004283857). Suggestions of NCBI for translation starts of *Octodon degus* (XP\_004648070), *Ochotona princeps* (XP\_004592817), *Macaca mulatta* (XP\_001096017) and *Bos taurus* (NP\_001193868) were changed to the position of the orthologous sequences.
