# Supplementary material for: Unusual Ratio between Free Thyroxine and Free Triiodothyronine in a Long-Lived Mole-Rat Species with Bimodal Ageing
Source: PubMed Central journal article supplement (PMC4237498; doi:10.1371/journal.pone.0113698), 2014-11-19
Supplement: pone.0113698.s012.pdf [file pone.0113698.s012.pdf]

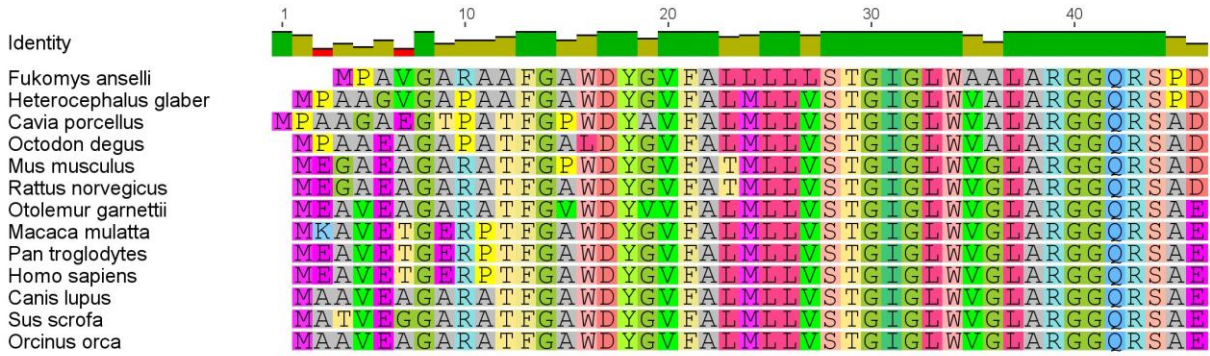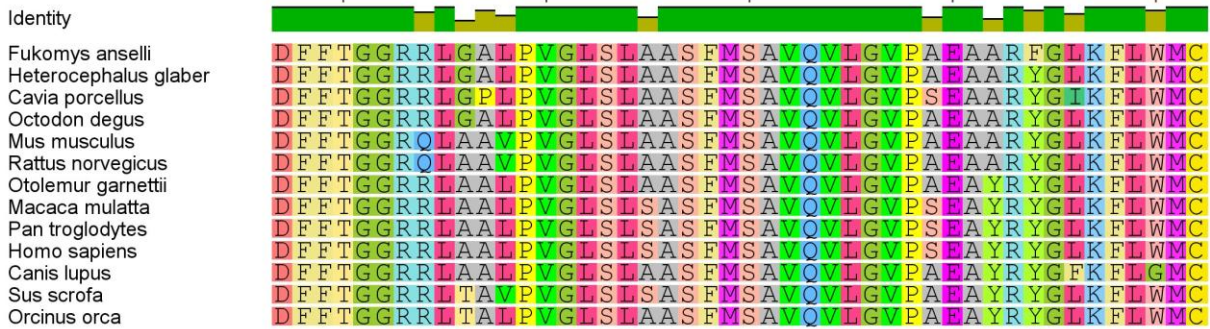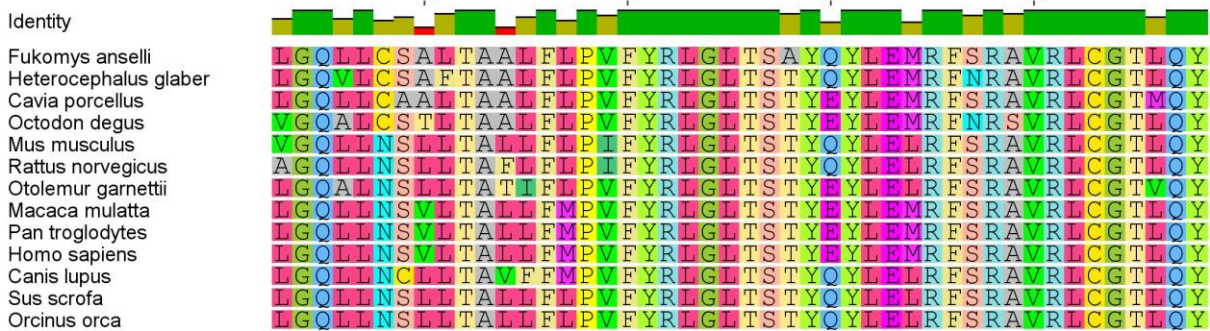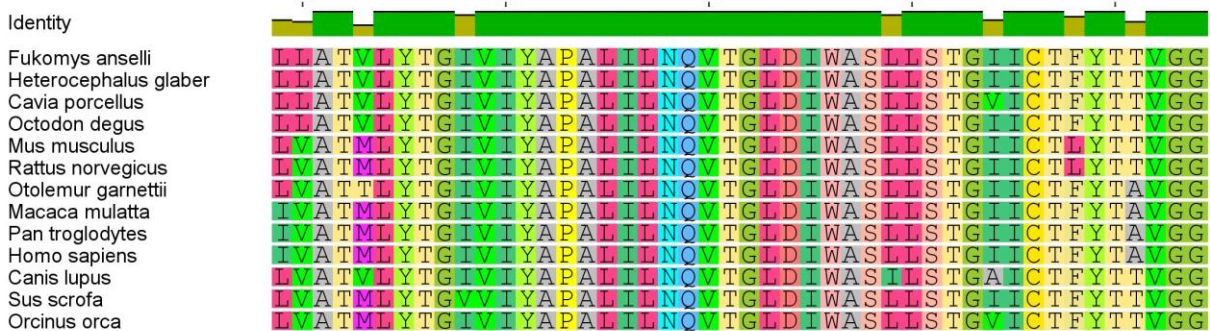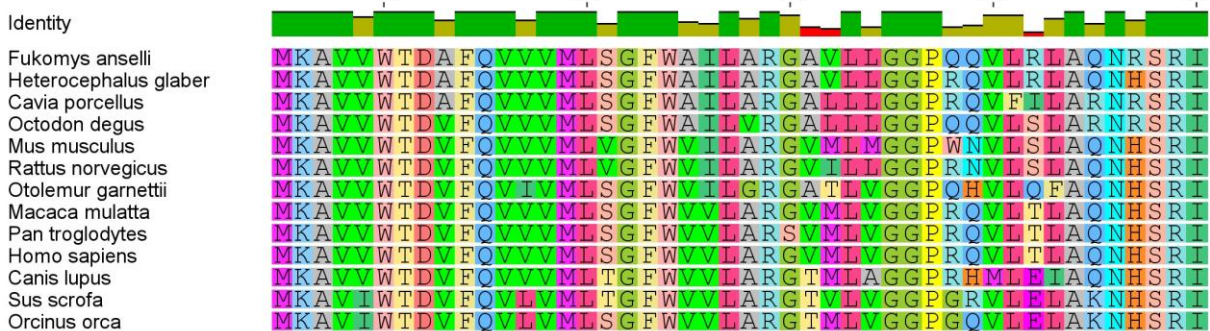







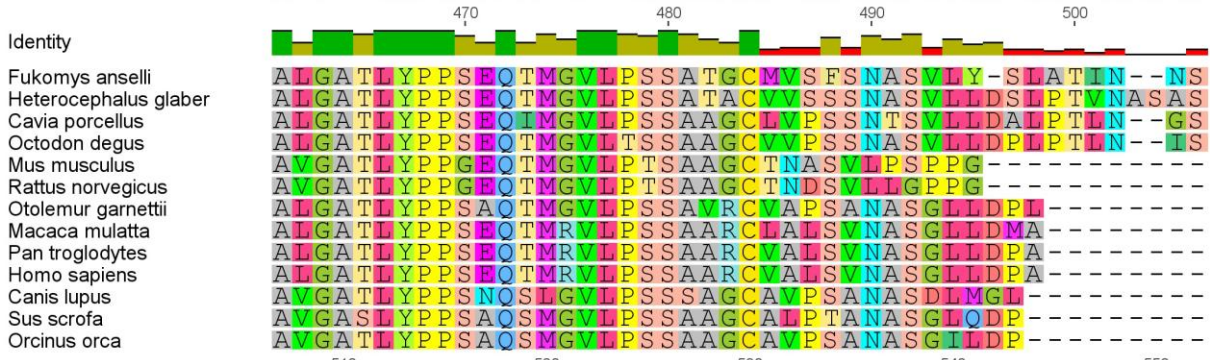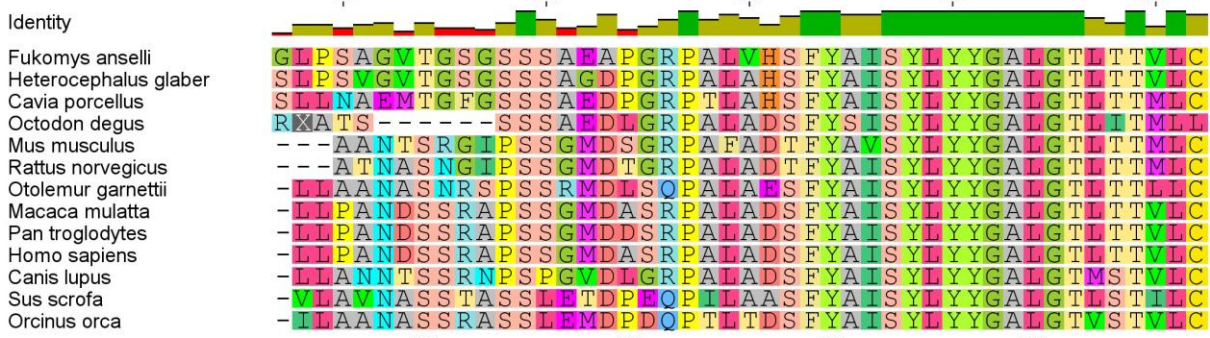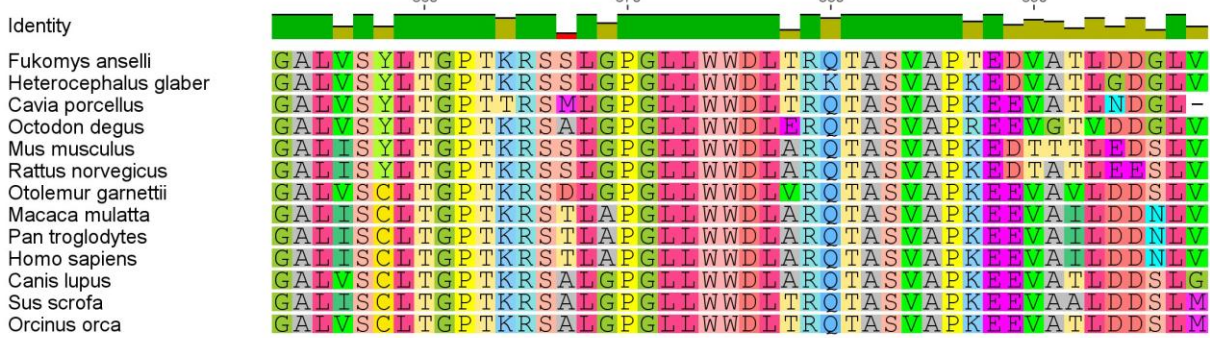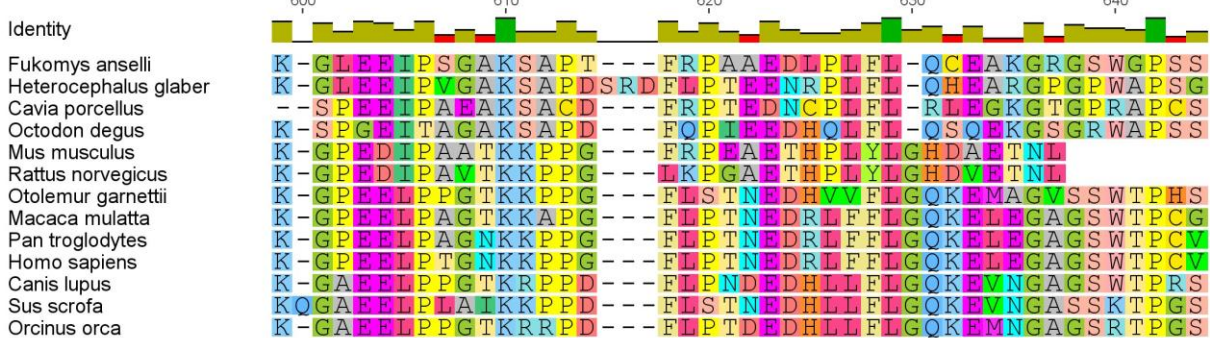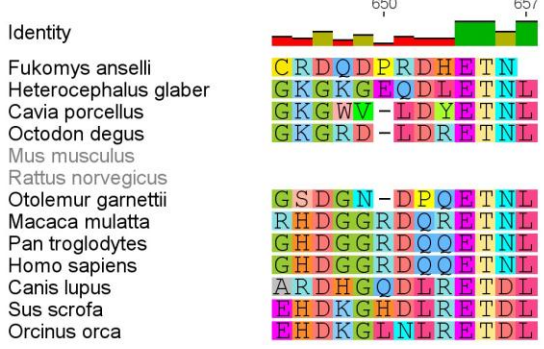

**Figure S12. Protein alignment of Natrium-Iodid-Symporter (NIS) from different mammal species.**

The mRNA sequence of *F. ansellii* was obtained from RNA-seq and subsequently translated, other sequences were retrieved from NCBI databases with the following accession numbers: *Heterocephalus glaber* (XP\_004873534), *Cavia porcellus* (XP\_003465226), *Octodon degus* (XP\_004646953), *Mus musculus* (NP\_444478), *Rattus norvegicus* (Q63008), *Otolemur garnettii* (XP\_003796602), *Macaca mulatta* (EHH29802), *Pan troglodytes* (XP\_524154), *Homo sapiens* (NP\_000444), *Canis lupus* (XP\_541946), *Sus scrofa* (NP\_999575), *Orcinus orca* (XP\_004277608).
