# Supplementary material for: Unusual Ratio between Free Thyroxine and Free Triiodothyronine in a Long-Lived Mole-Rat Species with Bimodal Ageing
Source: PubMed Central journal article supplement (PMC4237498; doi:10.1371/journal.pone.0113698), 2014-11-19
Supplement: pone.0113698.s013.pdf [file pone.0113698.s013.pdf]

**Table S1. Intra- and inter-assay variances of the Enzyme Immunoassays for fT3, fT4, tT3 and tT4:** Shown are the coefficients of variances (%CV) of the assays used in the present study, according to the manufacturer (DRG Instruments GmbH).

|            |                 | Intra-assay variance (in %CV) |        |       | Inter-assay variance (in %CV) |        |       |
|------------|-----------------|-------------------------------|--------|-------|-------------------------------|--------|-------|
|            | Model           | low                           | medium | high  | low                           | medium | high  |
| <b>FT3</b> | <b>EIA-2385</b> | 4.9%                          | 3.6%   | 3.1%  | 13.1%                         | 7.9%   | 10.2% |
| <b>FT4</b> | <b>EIA-2386</b> | 10.98%                        | 4.26%  | 3.25% | 10.81%                        | 6.01%  | 7.90% |
| <b>TT3</b> | <b>EIA-4569</b> | 6.61%                         | 6.54%  | 3.59% | 6.37%                         | 5.23%  | 6.73% |
| <b>TT4</b> | <b>EIA-4568</b> | 3.4%                          | 2.5%   | 5.6%  | 4.9%                          | 5.4%   | 8.1%  |
